# Supplementary material
Source: publisher figshare collection journal article supplement (https://diabetesjournals.figshare.com/articles/dataset/_/14531346)
Supplement: Supplementary file 1 [file 27856287]

## **Online Appendix**

**Supplemental Table 1**

**Supplemental Table 2**

**Supplemental Fig. 1 and legend**

**Supplemental Fig. 2 and legend**

**Supplemental Fig. 3 and legend**

**Supplemental Fig. 4 and legend**

**Supplemental table 1. Daily schedule of the CUMS paradigm**

|                                  |                                                               |
|----------------------------------|---------------------------------------------------------------|
| Swim stress (16°C/3min)          | D7, D11, D13, D24, D26                                        |
| Food and water deprivation       | D2, D8, D26, D33,                                             |
| Light on overnight               | D1, D4, D6, D8, D11, D13, D17, D18, D21, D28, D30, D32, D35   |
| Light off in the daytime         | D1, D4, D7, D10, D15, D18, D19, D22, D28, D35                 |
| Wet bedding overnight            | D2, D7, D16, D24, D31,                                        |
| Crowding                         | D2, D5, D9, D11, D17, D23, D29,                               |
| Tilt cage at 45 degree overnight | D5, D10, D12, D14, D16, D20, D25, D30, D34,                   |
| Empty cage overnight             | D3, D5, D9, D12, D15, D17, D22, D27, D31,                     |
| Hot stress (45°C/10 min)         | D4, D8, D14, D19, D25, D33,                                   |
| Elevated platform (30 min)       | D1, D3, D6, D21, D27,                                         |
| Restraint stress (1h)            | D3, D6, D9, D10, D12, D13, D14, D18, D20, D23, D29, D32, D34, |

**Supplemental table 2. Primers used in the real-time quantitative PCR analyses**

| <b>Gene</b>   | <b>Forward primer</b>        | <b>Reverse primer</b>          |
|---------------|------------------------------|--------------------------------|
| <i>Tph2</i>   | 5'-TCTACACCCCGGAACCAGAT-3'   | 5'-GCAAAGGCCGAACTCGATTG-3'     |
| <i>Vmat2</i>  | 5'-GGGGTATGCTATCGGTCCCT-3'   | 5'-TAATGGGGCAGTTGTGGTCC-3'     |
| <i>Sert</i>   | 5'-GACATCAGGAGGGGCGTATG-3'   | 5'-AGAAACAGAGGGCTGATGGC-3'     |
| <i>Maoa</i>   | 5'-ATGGGCTTCATACTTGCCCG-3'   | 5'-CTGCCGAATCACCTTCCATA-3'     |
| <i>Maob</i>   | 5'-GGAAGGGTTCTACGTCAGCC-3'   | 5'-TCGTGCAGGGACATCCAAAG-3'     |
| <i>Htr1a</i>  | 5'-TACTCCACTTTCGGCGCTTT-3'   | 5'-GGCTGACCATTGAGGCTCTT-3'     |
| <i>Htr1b</i>  | 5'-GCTTTGTGAACACCGACCAC-3'   | 5'-GAGCCCGGGAGTTAATGGAG-3'     |
| <i>Ntrk2</i>  | 5'-CCTGATGGCCAAGAACGAGT-3'   | 5'-CGGCATAGACCGAGAGATGC-3'     |
| <i>Agrp</i>   | 5'-AGACAACCTGCAGACCGAGC-3'   | 5'-CATTGAAGAAGCGGCAGTAGC-3'    |
| <i>Npy</i>    | 5'-CCGCCACGATGCTAGGTAAC-3'   | 5'-AGTGTCTCAGGGCTGGATCT-3'     |
| <i>Pomc</i>   | 5'-ATAGATGTGTGGAGCTGGTGC-3'  | 5'-ACTTCCGGGGGTTTTTCAGTC-3'    |
| <i>Cartpt</i> | 5'-GGACATCTACTCTGCCGTGG-3'   | 5'-CTGTGTCGCCCTTCACAAGCA-3'    |
| <i>Crh</i>    | 5'-ACCAAGGGAGGAGAAGAGAGC-3'  | 5'-TTCTTCACCCATGCGGATCA-3'     |
| <i>Trh</i>    | 5'-CTGGAAGCAGCCCAGGAG-3'     | 5'-CCGGATGCTGGCGTTTTG-3'       |
| <i>Mc4r</i>   | 5'-TGAGCAACTTTTTGTTTCCCCC-3' | 5'-AGGTTCTTGTTCTTGGCTATCG-3'   |
| <i>Lepr</i>   | 5'-TATGTGGTCCAGGTTTCGCTG-3'  | 5'-TTTCGTCAGGGGCTTCCAAA-3'     |
| <i>Insr</i>   | 5'-GCCGATATGGTGATGAGGAGC-3'  | 5'-TGGCAATATTTGATGGGACATCT-3'  |
| <i>Htr2c</i>  | 5'-ATCGCTGGACCGGTATGTAG-3'   | 5'-ACGCAGGTAGTATTATTCACGAAC-3' |
| <i>G6pc</i>   | 5'-TTACCAAGACTCCCAGGACTG-3'  | 5'-GAGCTGTTGCTGTAGTAGTCG-3'    |
| <i>Pck1</i>   | 5'-TAAGGAGGAAGGGTGGCTGG-3'   | 5'-GCCAGGAGCAACTCCAAAAA-3'     |
| <i>Acox1</i>  | 5'-CTTCGAGGGGGAGAACAACCTG-3' | 5'-TACCAATCTGGCTGCACGTA-3'     |
| <i>Cpt1a</i>  | 5'-CCATGATGGACCCCAACAACA-3'  | 5'-CATGGCTCAGACAGTACCTCC-3'    |
| <i>Fasn</i>   | 5'-AGATGGAAGGCTGGGCTCTA-3'   | 5'-CCTCTGAACCACTCACACCC-3'     |
| <i>Gpam</i>   | 5'-GTTGCCGTGTACGCTGAGAG-3'   | 5'-CTCGCTCGAGATAGGTGCTG-3'     |
| <i>Scd1</i>   | 5'-CCTGCCTCTTCGGGATTTT-3'    | 5'-GCCCATTCGTACACGTCATT-3'     |
| <i>Pparg</i>  | 5'-CGAGTCTGTGGGGATAAAGCA-3'  | 5'-ACCTGATGGCATTGTGAGAC-3'     |

|              |                             |                               |
|--------------|-----------------------------|-------------------------------|
| <i>Ucp2</i>  | 5'-GCGGTCCGGACACAATAGTA-3'  | 5'-GGGACCTTCAATCGGCAAGA-3'    |
| <i>Adrb1</i> | 5'-CCGCTACCTCGCCATCAC-3'    | 5'-CAGGAAGGACACCAACGC-3'      |
| <i>Adrb2</i> | 5'-TGGTTGGGCTACGTCAACTC-3'  | 5'-CCAGCTGACAAGTGTTTGGC-3'    |
| <i>Adrb3</i> | 5'-AGGGAAAAGAGAGCACCCCT-3'  | 5'-GCCATAGTGAGGAGACAGGGA-3'   |
| <i>Gapdh</i> | 5'-AGGTCGGTGTGAACGGATTTG-3' | 5'-TGTAGACCATGTAGTTGAGGTCA-3' |

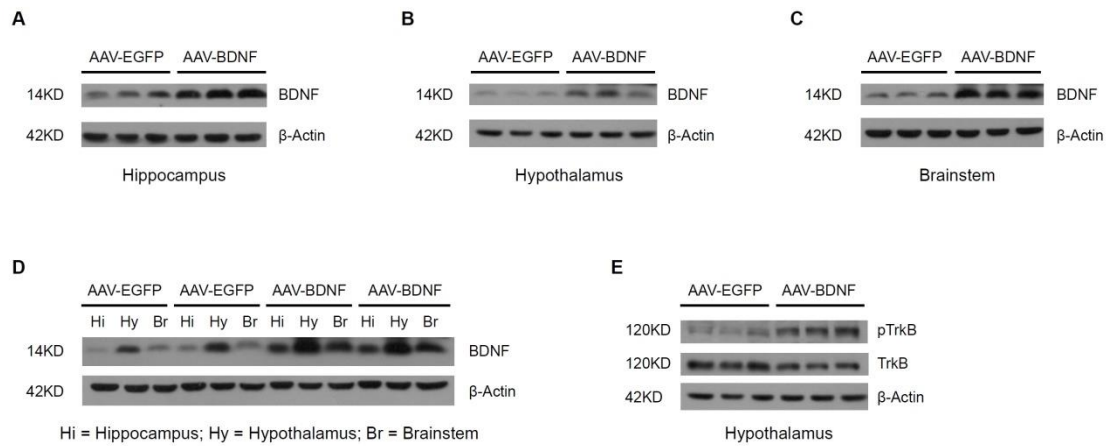

**Supplemental figure 1.** Protein levels of BDNF are elevated in the hippocampus, hypothalamus, and brainstem after BDNF gene transfer in the DRN. (A) Western blot assay of BDNF in the hippocampus. n = 3 mice per group. (B) Western blot assay of BDNF in the hypothalamus. n = 3 mice per group. (C) Western blot assay of BDNF in the brainstem (at the level posterior to the DRN). n = 3 mice per group. (D) Western blot assay of relative BDNF protein levels in the hippocampus (Hi), hypothalamus (Hy), and brainstem (Br). n = 2 mice per group. (E) Western blot assay of phosphorylated TrkB (pTrkB) in the hypothalamus. n = 3 mice per group.

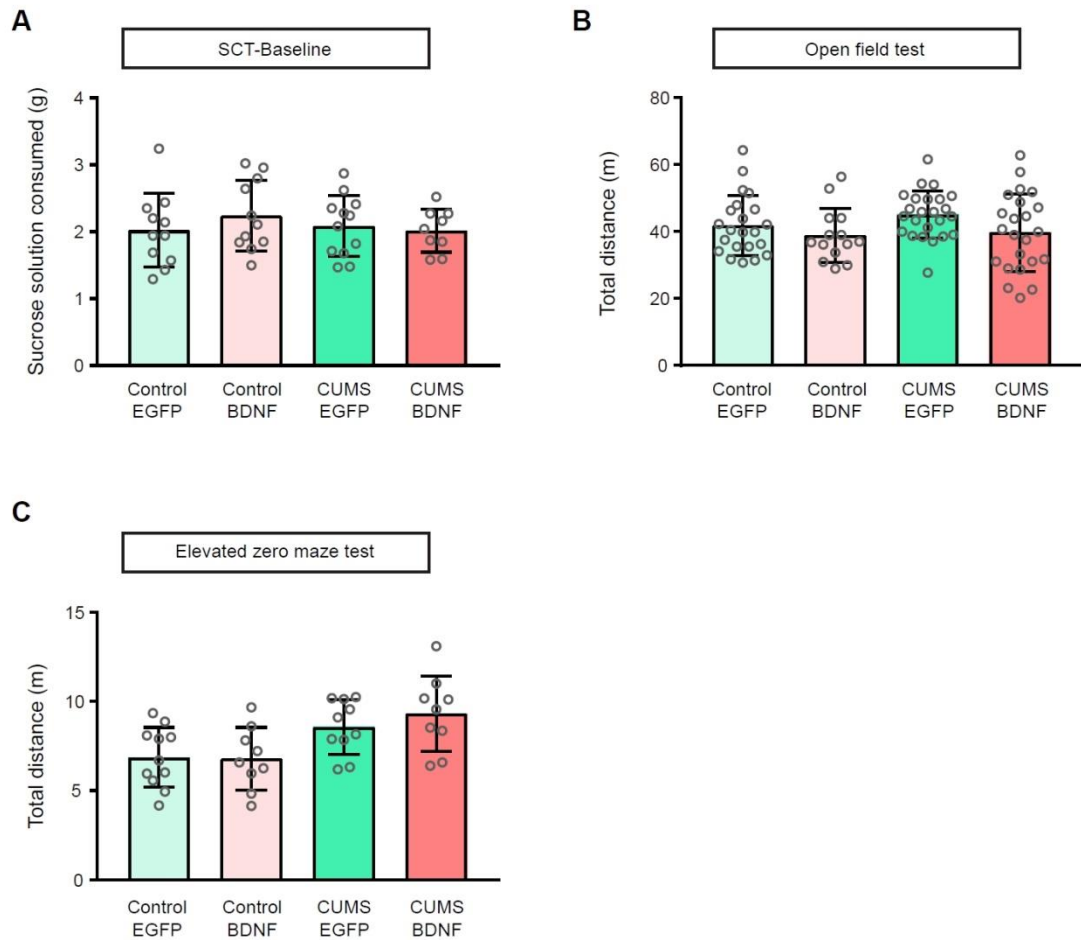

**Supplemental figure 2.** BDNF-expressing mice exhibit antidepressant and anxiolytic behaviors in the CUMS model. **(A)** Sucrose consumption at baseline.  $n = 9-12$  mice per group. **(B)** Total distance travelled by mice in the open field test after CUMS.  $n = 14-24$  mice per group. **(C)** Total distance travelled by mice in the elevated zero maze test after CUMS.  $n = 9-11$  mice per group. Two-way ANOVA followed by Tukey's multiple comparisons test. Data are presented as mean  $\pm$  SD.

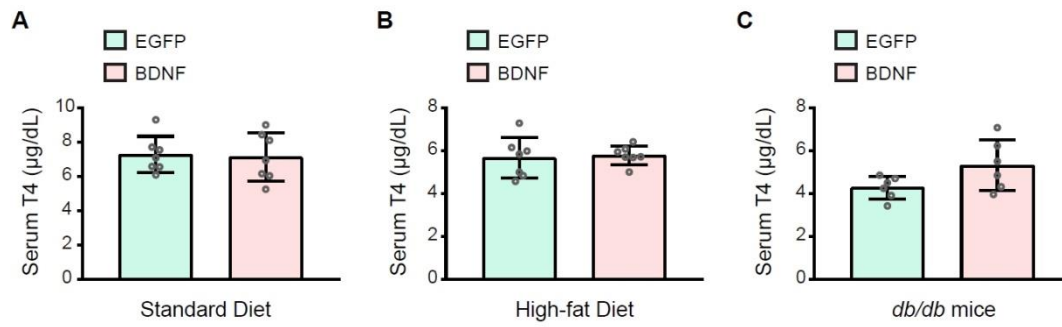

**Supplemental figure 3.** BDNF gene transfer in the DRN does not affect serum levels of T4. **(A)** Serum levels of T4 from standard-diet mice. **(B)** Serum levels of T4 from high-fat diet mice. **(C)** Serum levels of T4 from *db/db* mice.  $n = 6-7$  mice per group. Unpaired two-tailed Student's  $t$  test. Data are presented as mean  $\pm$  SD.

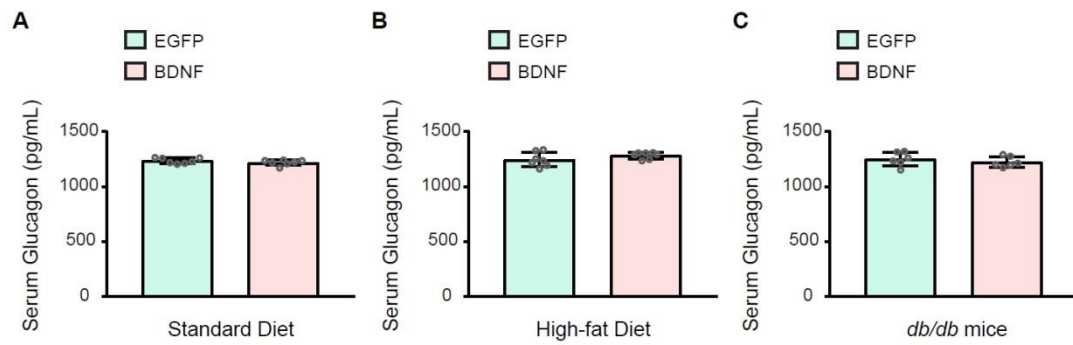

**Supplemental figure 4.** BDNF gene transfer in the DRN does not affect serum levels of glucagon. (A) Serum levels of glucagon from standard-diet mice. (B) Serum levels of glucagon from high-fat diet mice. (C) Serum levels of glucagon from *db/db* mice.  $n = 6-7$  mice per group. Unpaired two-tailed Student's  $t$  test. Data are presented as mean  $\pm$  SD.
